# Supplementary material for: Diversity and density relationships between lebensspuren and tracemaking organisms: a study case from abyssal northwest Pacific
Source: Copernicus journal article supplement (doi:10.5194/bg-21-641-2024), 2024-02-01
Supplement: Supplementary file 1 [file bg-21-641-2024-supplement.zip]

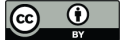

*Supplement of*

## **Diversity and density relationships between lebensspuren and tracemaking organisms: a study case from abyssal northwest Pacific**

**Olmo Miguez-Salas et al.**

*Correspondence to:* Olmo Miguez-Salas (olmo.miguez-salas@senckenberg.de)

- [bg-21-641-2024-supplement-title-page.pdf](#)
- [Supplement.xlsx](#)

The copyright of individual parts of the supplement might differ from the article licence.
