# Supplementary material for: Diversity and density relationships between lebensspuren and tracemaking organisms: a study case from abyssal northwest Pacific
Source: Copernicus journal article supplement (doi:10.5194/bg-21-641-2024), 2024-02-01
Supplement: Supplementary file 1 [file Supplement.xlsx]

## Sheet: Fauna
Name	Station 3	Station 4	Station 5	Station 6	Station 8	Station 9	Station 10	Station 11
"Shells" incertae sedis	1	4	0	1	1	1	0	4
"Stalks" incertae sedis	209	178	16	40	234	110	23	212
"Vermes" incertae sedis	2	0	0	0	3	1	1	1
Annelida > Polychaeta > Polychaeta fam.indet.gen.indet.sp.1	2	2	0	0	0	0	0	0
Annelida > Polychaeta > Polychaeta fam.indet.gen.indet.sp.2	0	0	0	0	0	0	0	1
Annelida > Polychaeta > Sabellidae gen.indet.sp.1	0	0	0	0	4	0	0	0
Annelida > Sipuncula fam.indet.gen.indet.sp.1	0	0	0	0	0	0	0	1
Chordata > Actinopterygii > Teleostei > Ipnopidae gen.indet.sp.1	1	3	0	0	0	0	0	0
Chordata > Actinopterygii > Teleostei > Macrouridae gen.indet.sp.1	0	1	1	0	1	0	0	0
Chordata > Actinopterygii > Teleostei > Macrouridae gen.indet.sp.2	0	0	0	1	3	0	0	0
Chordata > Tunicata > Octacnemidae gen.indet.sp.1	0	0	0	1	0	0	0	0
Chordata > Tunicata > Pyuridae gen.indet.sp.1	0	1	0	0	1	0	0	0
Chordata > Tunicata > Pyuridae gen.indet.sp.2	0	3	0	0	1	0	0	0
Chordata > Tunicata > Pyuridae gen.indet.sp.3	0	0	0	0	1	0	0	0
Cnidaria stet.	0	1	0	0	0	0	0	0
Cnidaria > Anthozoa stet.	0	13	0	0	0	0	0	0
Cnidaria > Anthozoa > Hexacorallia >Actiniaria fam.indet.gen.indet.sp.1	2	50	0	0	0	2	0	0
Cnidaria > Anthozoa > Hexacorallia > Actiniaria fam.indet.gen.indet.sp.2	0	1	0	0	0	0	0	0
Cnidaria > Anthozoa > Hexacorallia > Actiniaria fam.indet.gen.indet.sp.3	0	1	1	7	25	10	0	1
Cnidaria > Anthozoa > Hexacorallia >Actiniaria fam.indet.gen.indet.sp.4	0	1	0	0	0	0	0	0
Cnidaria > Anthozoa > Hexacorallia >Actiniaria fam.indet.gen.indet.sp.5	0	0	0	0	1	7	10	18
Cnidaria > Anthozoa > Hexacorallia >Actiniaria fam.indet.gen.indet.sp.7	53	1	0	0	0	0	0	0
Cnidaria > Anthozoa > Hexacorallia > Metridioidea Actinoscyphiidae.inc.gen.indet.sp.1	0	2	0	1	0	4	1	0
Cnidaria > Anthozoa > Octocorallia stet.	0	2	0	0	0	0	0	0
Cnidaria > Anthozoa > Octocorallia > Malacalcyonacea > Alcyoniidae inc.gen.indet.sp.1	2	0	0	1	0	1	0	4
Cnidaria > Anthozoa > Octocorallia > Pennatulacea > Pennatula sp.indet.1	0	0	0	1	2	0	0	0
Cnidaria > Anthozoa > Octocorallia > Pennatulacea > Pennatulacea fam.indet.gen.indet.sp.1	0	0	0	0	0	0	0	8
Cnidaria > Anthozoa > Octocorallia > Pennatulacea > Umbellulidae gen.indet.sp.1	0	0	0	0	0	0	1	16
Cnidaria > Anthozoa > Octocorallia > Pennatulacea > Umbellulidae gen.indet.sp.2	0	0	0	0	0	0	0	6
Cnidaria > Hydrozoa > Hydromedusae fam.indet.gen.indet.sp.1	0	0	2	0	4	1	0	0
Cnidaria > Scyphozoa > Scyphozoa fam.indet.gen.indet.sp.1	0	0	0	0	0	2	0	0
Crustacea > Decapoda > Caridea > Caridea fam.indet.gen.indet.sp.1	2	0	0	0	0	0	0	0
Crustacea > Decapoda > Decapoda fam.indet.gen.indet.sp.1	2	0	0	0	0	0	0	0
Crustacea > Decapoda > Dendrobranchiata > Aristeidae > Aristidae fam.inc.gen.indet.sp.1	0	0	0	0	0	1	0	0
Crustacea > Decapoda > Dendrobranchiata > Aristeidae > Cerataspis gen.inc.sp.1	1	0	0	0	0	0	0	0
Crustacea > Peracarida stet.	0	0	1	0	0	0	0	0
Crustacea > Peracarida > Amphipoda > Amphipoda fam.indet.gen.indet.sp.1	0	0	0	0	0	0	0	1
Crustacea > Peracarida > Isopoda > Munnopsidae fam.inc.gen.indet.sp.2	0	1	0	0	0	0	0	0
Crustacea > Peracarida > Isopoda > Flabellifera.fam.indet.gen.indet.sp.1	0	1	0	0	0	0	0	0
Crustacea > Peracarida > Isopoda > Munnopsidae > Munnopsidae gen.indet.sp.1	0	1	0	0	0	0	0	0
Echinodermata > Asteroidea > Asteroidea fam.indet.gen.indet.sp.1	0	2	0	0	1	0	1	0
Echinodermata > Asteroidea > Asteroidea fam.indet.gen.indet.sp.2	0	1	0	0	0	0	0	0
Echinodermata > Asteroidea > Asteroidea fam.indet.gen.indet.sp.3	0	2	0	0	0	0	0	0
Echinodermata > Asteroidea > Asteroidea fam.indet.gen.indet.sp.4	0	0	3	0	0	0	2	0
Echinodermata > Asteroidea > Asteroidea fam.indet.gen.indet.sp.5	0	0	0	0	0	2	0	0
Echinodermata > Asteroidea > Asteroidea fam.indet.gen.indet.sp.6	0	0	0	0	1	0	0	0
Echinodermata > Asteroidea > Asteroidea fam.indet.gen.indet.sp.7	0	0	0	1	0	0	0	0
Echinodermata > Asteroidea > Asteroidea fam.indet.gen.indet.sp.8	0	0	0	1	0	0	0	0
Echinodermata > Asteroidea > Asteroidea fam.indet.gen.indet.sp.9	1	0	0	0	0	0	0	0
Echinodermata > Crinoidea fam.indet.gen.indet.sp.1	2	0	1	1	2	0	0	0
Echinodermata > Echinoidea > Kamptosoma gen.inc.sp.1	0	0	5	0	5	0	8	4
Echinodermata > Echinoidea > Echinocrepis sp.1	1	0	0	0	0	0	0	0
Echinodermata > Echinoidea > Echinoidea fam.indet.gen.indet.sp.1	0	4	0	6	2	1	0	0
Echinodermata > Echinoidea > Echinoidea fam.indet.gen.indet.sp.2	0	0	2	0	0	0	0	0
Echinodermata > Echinoidea > Echinoidea fam.indet.gen.indet.sp.3	0	0	0	0	0	2	1	1
Echinodermata > Echinoidea > Echinoidea fam.indet.gen.indet.sp.4	0	0	0	0	1	0	0	0
Echinodermata > Echinoidea > Echinoidea fam.indet.gen.indet.sp.5	0	0	0	0	0	0	2	0
Echinodermata > Echinoidea > Echinoidea fam.indet.gen.indet.sp.6	0	1	0	0	0	0	0	0
Echinodermata > Echinoidea > Echinoidea fam.indet.gen.indet.sp.7	0	0	0	0	0	0	0	1
Echinodermata > Holothuroidea > Pseudostichopodidae > Pseudostichopus gen.inc.	0	1	0	0	0	0	0	0
Echinodermata > Holothuroidea > Synallactidae > Synallactidae fam.inc.gen.indet.sp.1	0	4	0	2	0	0	0	1
Echinodermata > Holothuroidea > Elpidiidae > Elpidia > Elpidia gen.inc.sp.1	0	152	0	0	0	0	0	0
Echinodermata > Holothuroidea > Elpidiidae > Peniagone > Peniagone gen.inc.sp.1	4	12	0	0	0	0	1	0
Echinodermata > Holothuroidea > Elpidiidae > Peniagone > Peniagone sp.2	0	0	1	2	0	0	0	0
Echinodermata > Holothuroidea > Elpidiidae > Peniagone > Peniagone sp.3	0	0	1	0	0	0	0	0
Echinodermata > Holothuroidea > Elpidiidae > Scotoplanes > Scotoplanes sp.1	1	0	0	0	0	85	0	124
Echinodermata > Holothuroidea > Elpidiidae > Scotoplanes > Scotoplanes sp.2	0	0	0	0	0	0	0	4
Echinodermata > Holothuroidea > Holothuroidea fam.indet.gen.indet.sp.1	0	0	0	0	0	0	0	1
Echinodermata > Holothuroidea > Holothuroidea fam.indet.gen.indet.sp.2	0	0	1	0	0	0	0	0
Echinodermata > Holothuroidea > Pelagothuriidae > Enypniastes sp.1	2	0	0	1	1	0	0	0
Echinodermata > Holothuroidea > Psychropotidae > Benthodytes sp.1	0	3	0	1	0	0	4	0
Echinodermata > Holothuroidea > Psychropotidae > Psychropotes sp.1	0	0	4	3	0	1	0	0
Echinodermata > Holothuroidea > Psychropotidae > Psychropotes sp.2	0	0	4	0	0	0	0	0
Echinodermata > Ophiuroidea stet.	0	1	0	0	0	0	0	0
Echinodermata > Ophiuroidea > Ophiuroidea fam.indet.gen.indet.sp.1	0	1	0	0	0	0	0	0
Echinodermata > Ophiuroidea > Ophiuroidea fam.indet.gen.indet.sp.2	24	11	0	0	0	0	0	0
Echinodermata > Ophiuroidea > Ophiuroidea fam.indet.gen.indet.sp.3	1	0	3	0	0	3	1	4
Hemichordata > Enteropneusta > Enteropneusta fam.indet.gen.indet.sp.1	0	1	0	0	0	0	0	0
Hemichordata > Enteropneusta > Enteropneusta fam.indet.gen.indet.sp.2	0	0	0	0	2	0	0	0
Hemichordata > Enteropneusta > Torquaratoridae > Torquaratoridae gen.indet.sp.1	0	1	0	0	0	0	0	0
indet.	130	88	93	259	213	439	113	85
Mollusca > Cephalopoda > Grimpoteuthidae > Grimpoteuthis sp.1	1	0	0	0	0	0	0	0
Mollusca > Gastropoda > Gastropoda fam.indet.gen.indet.sp.1	0	3	0	0	0	0	0	0
Mollusca > Gastropoda > Gastropoda fam.indet.gen.indet.sp.2	0	0	0	0	0	0	0	1
Mollusca > Gastropoda > Gastropoda fam.indet.gen.indet.sp.3	0	0	0	1	4	3	2	0
Mollusca > Gastropoda > Gastropoda fam.indet.gen.indet.sp.4	0	0	0	0	0	2	0	0
Mollusca > Gastropoda > Gastropoda fam.indet.gen.indet.sp.5	0	0	0	0	1	0	0	0
Mollusca > Gastropoda > Gastropoda fam.indet.gen.indet.sp.6	0	0	0	0	1	0	0	0
Mollusca > Scaphopoda stat.	0	0	0	0	0	0	0	6
Porifera > Hexactinellida > Hyalonematidae > Hyalonema gen.inc.sp.1	0	0	0	1	0	0	0	0
Porifera > Demospongiae > Cladorhizidae > Chladorhizidae gen.indet.sp.1	0	1	0	0	0	0	0	0
Protista stet.	0	3	0	15	0	2	0	1
Protista > Xenophyophora stet.	116	50	18	403	7	43	10	1
	560	609	157	750	522	723	181	507

## Sheet: Tracemakers
Name	Station 3	Station 4	Station 5	Station 6	Station 8	Station 9	Station 10	Station 11
Annelida > Polychaeta > Polychaeta fam.indet.gen.indet.sp.1	2	2	0	0	0	0	0	0
Annelida > Polychaeta > Polychaeta fam.indet.gen.indet.sp.2	0	0	0	0	0	0	0	1
Annelida > Sipuncula fam.indet.gen.indet.sp.1	0	0	0	0	0	0	0	1
Cnidaria > Anthozoa > Hexacorallia >Actiniaria fam.indet.gen.indet.sp.1	2	50	0	0	0	2	0	0
Cnidaria > Anthozoa > Hexacorallia > Actiniaria fam.indet.gen.indet.sp.3	0	1	1	7	25	10	0	1
Cnidaria > Anthozoa > Hexacorallia >Actiniaria fam.indet.gen.indet.sp.7	53	1	0	0	0	0	0	0
Echinodermata > Asteroidea > Asteroidea fam.indet.gen.indet.sp.1	0	2	0	0	1	0	1	0
Echinodermata > Asteroidea > Asteroidea fam.indet.gen.indet.sp.2	0	1	0	0	0	0	0	0
Echinodermata > Asteroidea > Asteroidea fam.indet.gen.indet.sp.3	0	2	0	0	0	0	0	0
Echinodermata > Asteroidea > Asteroidea fam.indet.gen.indet.sp.4	0	0	3	0	0	0	2	0
Echinodermata > Asteroidea > Asteroidea fam.indet.gen.indet.sp.5	0	0	0	0	0	2	0	0
Echinodermata > Asteroidea > Asteroidea fam.indet.gen.indet.sp.6	0	0	0	0	1	0	0	0
Echinodermata > Asteroidea > Asteroidea fam.indet.gen.indet.sp.7	0	0	0	1	0	0	0	0
Echinodermata > Asteroidea > Asteroidea fam.indet.gen.indet.sp.8	0	0	0	1	0	0	0	0
Echinodermata > Asteroidea > Asteroidea fam.indet.gen.indet.sp.9	1	0	0	0	0	0	0	0
Echinodermata > Echinoidea > Echinocrepis sp.1	1	0	0	0	0	0	0	0
Echinodermata > Echinoidea > Echinoidea fam.indet.gen.indet.sp.2	0	0	2	0	0	0	0	0
Echinodermata > Echinoidea > Echinoidea fam.indet.gen.indet.sp.5	0	0	0	0	0	0	2	0
Echinodermata > Echinoidea > Echinoidea fam.indet.gen.indet.sp.6	0	1	0	0	0	0	0	0
Echinodermata > Echinoidea > Echinoidea fam.indet.gen.indet.sp.7	0	0	0	0	0	0	0	1
Echinodermata > Holothuroidea > Pseudostichopodidae > Pseudostichopus gen.inc.	0	1	0	0	0	0	0	0
Echinodermata > Holothuroidea > Synallactidae > Synallactidae fam.inc.gen.indet.sp.1	0	4	0	2	0	0	0	1
Echinodermata > Holothuroidea > Elpidiidae > Elpidia > Elpidia gen.inc.sp.1	0	152	0	0	0	0	0	0
Echinodermata > Holothuroidea > Elpidiidae > Peniagone > Peniagone gen.inc.sp.1	4	12	0	0	0	0	1	0
Echinodermata > Holothuroidea > Elpidiidae > Peniagone > Peniagone sp.2	0	0	1	2	0	0	0	0
Echinodermata > Holothuroidea > Elpidiidae > Peniagone > Peniagone sp.3	0	0	1	0	0	0	0	0
Echinodermata > Holothuroidea > Elpidiidae > Scotoplanes > Scotoplanes sp.1	1	0	0	0	0	85	0	124
Echinodermata > Holothuroidea > Elpidiidae > Scotoplanes > Scotoplanes sp.2	0	0	0	0	0	0	0	4
Echinodermata > Holothuroidea > Holothuroidea fam.indet.gen.indet.sp.1	0	0	0	0	0	0	0	1
Echinodermata > Holothuroidea > Holothuroidea fam.indet.gen.indet.sp.2	0	0	1	0	0	0	0	0
Echinodermata > Holothuroidea > Pelagothuriidae > Enypniastes sp.1	2	0	0	1	1	0	0	0
Echinodermata > Holothuroidea > Psychropotidae > Benthodytes sp. 1	0	3	0	1	0	0	4	0
Echinodermata > Holothuroidea > Psychropotidae > Psychropotes sp.1	0	0	4	3	0	1	0	0
Echinodermata > Holothuroidea > Psychropotidae > Psychropotes sp.2	0	0	4	0	0	0	0	0
Echinodermata > Ophiuroidea stet.	0	1	0	0	0	0	0	0
Echinodermata > Ophiuroidea > Ophiuroidea fam.indet.gen.indet.sp.1	0	1	0	0	0	0	0	0
Echinodermata > Ophiuroidea > Ophiuroidea fam.indet.gen.indet.sp.2	24	11	0	0	0	0	0	0
Echinodermata > Ophiuroidea > Ophiuroidea fam.indet.gen.indet.sp.3	1	0	3	0	0	3	1	4
Hemichordata > Enteropneusta > Enteropneusta fam.indet.gen.indet.sp.1	0	1	0	0	0	0	0	0
Hemichordata > Enteropneusta > Enteropneusta fam.indet.gen.indet.sp.2	0	0	0	0	2	0	0	0
Hemichordata > Enteropneusta > Torquaratoridae > Torquaratoridae gen.indet.sp.1	0	1	0	0	0	0	0	0
Mollusca > Gastropoda > Gastropoda fam.indet.gen.indet.sp.1	0	3	0	0	0	0	0	0
Mollusca > Gastropoda > Gastropoda fam.indet.gen.indet.sp.2	0	0	0	0	0	0	0	1
Mollusca > Gastropoda > Gastropoda fam.indet.gen.indet.sp.3	0	0	0	1	4	3	2	0
Mollusca > Gastropoda > Gastropoda fam.indet.gen.indet.sp.4	0	0	0	0	0	2	0	0
Mollusca > Gastropoda > Gastropoda fam.indet.gen.indet.sp.5	0	0	0	0	1	0	0	0
Mollusca > Gastropoda > Gastropoda fam.indet.gen.indet.sp.6	0	0	0	0	1	0	0	0
	91	250	20	19	36	108	13	139

## Sheet: Disturbing fauna
Name	Station 3	Station 4	Station 5	Station 6	Station 8	Station 9	Station 10	Station 11
Annelida > Polychaeta > Polychaeta fam.indet.gen.indet.sp.1	2	2	0	0	0	0	0	0
Annelida > Polychaeta > Polychaeta fam.indet.gen.indet.sp.2	0	0	0	0	0	0	0	1
Annelida > Polychaeta > Sabellidae gen.indet.sp.1	0	0	0	0	4	0	0	0
Annelida > Sipuncula fam.indet.gen.indet.sp.1	0	0	0	0	0	0	0	1
Chordata > Actinopterygii > Teleostei > Macrouridae gen.indet.sp.1	0	1	1	0	1	0	0	0
Chordata > Actinopterygii > Teleostei > Macrouridae gen.indet.sp.2	0	0	0	1	3	0	0	0
Cnidaria > Anthozoa stet.	0	13	0	0	0	0	0	0
Cnidaria > Anthozoa > Hexacorallia >Actiniaria fam.indet.gen.indet.sp.1	2	50	0	0	0	2	0	0
Cnidaria > Anthozoa > Hexacorallia > Actiniaria fam.indet.gen.indet.sp.3	0	1	1	7	25	10	0	1
Cnidaria > Anthozoa > Hexacorallia >Actiniaria fam.indet.gen.indet.sp.5	0	0	0	0	1	7	10	18
Cnidaria > Anthozoa > Hexacorallia >Actiniaria fam.indet.gen.indet.sp.7	53	1	0	0	0	0	0	0
Crustacea > Decapoda > Caridea > Caridea fam.indet.gen.indet.sp.1	2	0	0	0	0	0	0	0
Crustacea > Decapoda > cf_Decapoda fam.indet.gen.indet.sp.1	2	0	0	0	0	0	0	0
Crustacea > Decapoda > Dendrobranchiata > Aristeidae > Aristidae fam.inc.gen.indet.sp.1	0	0	0	0	0	1	0	0
Crustacea > Decapoda > Dendrobranchiata > Aristeidae > Cerataspis gen.inc.sp.1	1	0	0	0	0	0	0	0
Crustacea > Peracarida stet.	0	0	1	0	0	0	0	0
Crustacea > Peracarida > Amphipoda > Amphipoda fam.indet.gen.indet.sp.1	0	0	0	0	0	0	0	1
Crustacea > Peracarida > Isopoda > Munnopsidae fam.inc.gen.indet.sp.2	0	1	0	0	0	0	0	0
Crustacea > Peracarida > Isopoda > Flabellifera.fam.indet.gen.indet.sp.1	0	1	0	0	0	0	0	0
Crustacea > Peracarida > Isopoda > Munnopsidae > Munnopsidae gen.indet.sp.1	0	1	0	0	0	0	0	0
Echinodermata > Asteroidea > Asteroidea fam.indet.gen.indet.sp.1	0	2	0	0	1	0	1	0
Echinodermata > Asteroidea > Asteroidea fam.indet.gen.indet.sp.2	0	1	0	0	0	0	0	0
Echinodermata > Asteroidea > Asteroidea fam.indet.gen.indet.sp.3	0	2	0	0	0	0	0	0
Echinodermata > Asteroidea > Asteroidea fam.indet.gen.indet.sp.4	0	0	3	0	0	0	2	0
Echinodermata > Asteroidea > Asteroidea fam.indet.gen.indet.sp.5	0	0	0	0	0	2	0	0
Echinodermata > Asteroidea > Asteroidea fam.indet.gen.indet.sp.6	0	0	0	0	1	0	0	0
Echinodermata > Asteroidea > Asteroidea fam.indet.gen.indet.sp.7	0	0	0	1	0	0	0	0
Echinodermata > Asteroidea > Asteroidea fam.indet.gen.indet.sp.8	0	0	0	1	0	0	0	0
Echinodermata > Asteroidea > Asteroidea fam.indet.gen.indet.sp.9	1	0	0	0	0	0	0	0
Echinodermata > Echinoidea > Kamptosoma gen.inc.sp.1	0	0	5	0	5	0	8	4
Echinodermata > Echinoidea > Echinocrepis sp.1	1	0	0	0	0	0	0	0
Echinodermata > Echinoidea > Echinoidea fam.indet.gen.indet.sp.1	0	4	0	6	2	1	0	0
Echinodermata > Echinoidea > Echinoidea fam.indet.gen.indet.sp.2	0	0	2	0	0	0	0	0
Echinodermata > Echinoidea > Echinoidea fam.indet.gen.indet.sp.3	0	0	0	0	0	2	1	1
Echinodermata > Echinoidea > Echinoidea fam.indet.gen.indet.sp.4	0	0	0	0	1	0	0	0
Echinodermata > Echinoidea > Echinoidea fam.indet.gen.indet.sp.5	0	0	0	0	0	0	2	0
Echinodermata > Echinoidea > Echinoidea fam.indet.gen.indet.sp.6	0	1	0	0	0	0	0	0
Echinodermata > Echinoidea > Echinoidea fam.indet.gen.indet.sp.7	0	0	0	0	0	0	0	1
Echinodermata > Holothuroidea > Pseudostichopodidae > Pseudostichopus gen.inc.	0	1	0	0	0	0	0	0
Echinodermata > Holothuroidea > Synallactidae > Synallactidae fam.inc.gen.indet.sp.1	0	4	0	2	0	0	0	1
Echinodermata > Holothuroidea > Elpidiidae > Elpidia > Elpidia gen.inc.sp.1	0	152	0	0	0	0	0	0
Echinodermata > Holothuroidea > Elpidiidae > Peniagone > Peniagone gen.inc.sp.1	4	12	0	0	0	0	1	0
Echinodermata > Holothuroidea > Elpidiidae > Peniagone > Peniagone sp.2	0	0	1	2	0	0	0	0
Echinodermata > Holothuroidea > Elpidiidae > Peniagone > Peniagone sp.3	0	0	1	0	0	0	0	0
Echinodermata > Holothuroidea > Elpidiidae > Scotoplanes > Scotoplanes sp.1	1	0	0	0	0	85	0	124
Echinodermata > Holothuroidea > Elpidiidae > Scotoplanes > Scotoplanes sp.2	0	0	0	0	0	0	0	4
Echinodermata > Holothuroidea > Holothuroidea fam.indet.gen.indet.sp.1	0	0	0	0	0	0	0	1
Echinodermata > Holothuroidea > Holothuroidea fam.indet.gen.indet.sp.2	0	0	1	0	0	0	0	0
Echinodermata > Holothuroidea > Psychropotidae > Benthodytes sp.1	0	3	0	1	0	0	4	0
Echinodermata > Holothuroidea > Psychropotidae > Psychropotes sp.1	0	0	4	3	0	1	0	0
Echinodermata > Holothuroidea > Psychropotidae > Psychropotes sp.2	0	0	4	0	0	0	0	0
Echinodermata > Ophiuroidea stet.	0	1	0	0	0	0	0	0
Echinodermata > Ophiuroidea > Ophiuroidea fam.indet.gen.indet.sp.1	0	1	0	0	0	0	0	0
Echinodermata > Ophiuroidea > Ophiuroidea fam.indet.gen.indet.sp.2	24	11	0	0	0	0	0	0
Echinodermata > Ophiuroidea > Ophiuroidea fam.indet.gen.indet.sp.3	1	0	3	0	0	3	1	4
Hemichordata > Enteropneusta > Enteropneusta fam.indet.gen.indet.sp.1	0	1	0	0	0	0	0	0
Hemichordata > Enteropneusta > Enteropneusta fam.indet.gen.indet.sp.2	0	0	0	0	2	0	0	0
Hemichordata > Enteropneusta > Torquaratoridae > Torquaratoridae gen.indet.sp.1	0	1	0	0	0	0	0	0
Mollusca > Cephalopoda > Grimpoteuthidae > Grimpoteuthis sp.1	1	0	0	0	0	0	0	0
Mollusca > Gastropoda > Gastropoda fam.indet.gen.indet.sp.1	0	3	0	0	0	0	0	0
Mollusca > Gastropoda > Gastropoda fam.indet.gen.indet.sp.2	0	0	0	0	0	0	0	1
Mollusca > Gastropoda > Gastropoda fam.indet.gen.indet.sp.3	0	0	0	1	4	3	2	0
Mollusca > Gastropoda > Gastropoda fam.indet.gen.indet.sp.4	0	0	0	0	0	2	0	0
Mollusca > Gastropoda > Gastropoda fam.indet.gen.indet.sp.5	0	0	0	0	1	0	0	0
Mollusca > Gastropoda > Gastropoda fam.indet.gen.indet.sp.6	0	0	0	0	1	0	0	0
Mollusca > Scaphopoda fam.indet.gen.indet.sp.1	0	0	0	0	0	0	0	6
	95	271	27	25	52	119	32	169

## Sheet: Lebensspuren
Name	Station 3	Station 4	Station 5	Station 6	Station 8	Station 9	Station 10	Station 11
M-ridged trail	83	23	10	7	11	8	16	44
Flat trail	0	0	1	6	1	0	17	0
Rounded faecal casts	14	9	5	0	1	2066	13	1788
Smooth faecal casts	2	24	398	171	57	1	219	13
Mounded faecal casts	2	1	0	0	0	1	0	0
Coiled and curly faecal casts	0	0	152	78	18	1	20	0
Knotted faecal casts	38	212	1	6	0	0	22	0
Wavy faecal casts	2	3	1	2	1	0	4	2
Acorn faecal spirals	0	4	0	0	0	0	0	0
Acorn faecal switchbacks	5	4	0	0	0	0	0	0
Variable thin trail	0	7	6	15	14	15	9	4
Mounded trail	1	0	1	8	6	2	4	2
Single burrow	489	232	205	130	93	151	134	169
Paired burrow	141	177	96	75	53	68	143	172
Cluster burrow	47	76	55	27	10	27	9	19
Lined burrows	5	0	0	0	0	16	0	0
Rosette	0	0	1	4	2	2	8	0
Mounds	17	24	5	8	22	30	42	3
Ophiuroid impression	23	8	0	0	0	0	0	0
Asteroid impression	1	0	4	1	2	4	3	1
Circular impression	269	143	14	4	2	0	0	0
Crater cone	0	0	0	0	0	0	2	0
Crater	68	44	19	27	28	56	22	12
